# Supplementary material for: Tolerant Larvae and Sensitive Juveniles: Integrating Metabolomics and Whole-Organism Responses to Define Life-Stage Specific Sensitivity to Ocean Acidification in the American Lobster
Source: MDPI journal article supplement (doi:10.3390/metabo11090584), 2021-08-30

## Supplementary Material

**Table S1:** Stage survival and morphological measurements for each  $p\text{CO}_2$  condition of exposure at each stage of development.

| stage | $p\text{CO}_2$  |    | Survival (%) |    | Rostrum (mm) |      | Cephalothorax (mm) |      | Abdomen (mm) |      | Tail (mm) |      | Claw (mm) |      | Total length (mm) |      | Abdomen / Total length |      | Cephalothorax / Total length |      | Cephalothorax / Abdomen |      |
|-------|-----------------|----|--------------|----|--------------|------|--------------------|------|--------------|------|-----------|------|-----------|------|-------------------|------|------------------------|------|------------------------------|------|-------------------------|------|
|       | $\mu\text{atm}$ |    |              |    | Mean         | SE   | Mean               | SE   | Mean         | SE   | Mean      | SE   | Mean      | SE   | Mean              | SE   | Mean                   | SE   | Mean                         | SE   | Mean                    | SE   |
| I     | 400             | 20 | 51           | 13 | 1.61         | 0.04 | 1.79               | 0.03 | 2.68         | 0.05 | 1.33      | 0.05 | 0.81      | 0.04 | 4.47              | 0.07 | 0.60                   | 0.01 | 0.40                         | 0.01 | 0.67                    | 0.02 |
| I     | 600             | 18 | 54           | 7  | 1.54         | 0.04 | 1.88               | 0.06 | 2.69         | 0.08 | 1.33      | 0.04 | 0.89      | 0.05 | 4.57              | 0.12 | 0.59                   | 0.01 | 0.41                         | 0.01 | 0.71                    | 0.02 |
| I     | 800             | 20 | 59           | 7  | 1.57         | 0.03 | 1.90               | 0.05 | 2.80         | 0.06 | 1.40      | 0.03 | 0.75      | 0.03 | 4.70              | 0.06 | 0.60                   | 0.01 | 0.40                         | 0.01 | 0.69                    | 0.03 |
| I     | 1000            | 20 | 47           | 13 | 1.46         | 0.07 | 2.08               | 0.10 | 2.83         | 0.11 | 1.31      | 0.05 | 0.83      | 0.05 | 4.90              | 0.20 | 0.58                   | 0.01 | 0.42                         | 0.01 | 0.74                    | 0.02 |
| I     | 1200            | 18 | 67           | 5  | 1.56         | 0.04 | 2.08               | 0.09 | 2.91         | 0.12 | 1.38      | 0.05 | 0.94      | 0.06 | 4.99              | 0.20 | 0.58                   | 0.01 | 0.42                         | 0.01 | 0.72                    | 0.03 |
| I     | 2000            | 15 | 53           | 8  | 1.59         | 0.05 | 1.92               | 0.07 | 2.79         | 0.10 | 1.35      | 0.05 | 0.77      | 0.05 | 4.71              | 0.14 | 0.59                   | 0.01 | 0.41                         | 0.01 | 0.70                    | 0.03 |
| I     | 3000            | 20 | 78           | 10 | 1.48         | 0.06 | 1.90               | 0.08 | 2.79         | 0.08 | 1.34      | 0.05 | 0.83      | 0.03 | 4.68              | 0.14 | 0.60                   | 0.01 | 0.40                         | 0.01 | 0.68                    | 0.02 |
| II    | 400             | 15 | 100          | 0  | 1.65         | 0.07 | 2.30               | 0.08 | 3.28         | 0.13 | 1.37      | 0.05 | 0.94      | 0.05 | 5.58              | 0.20 | 0.59                   | 0.01 | 0.41                         | 0.01 | 0.71                    | 0.02 |
| II    | 600             | 17 | 97           | 3  | 1.55         | 0.05 | 2.57               | 0.07 | 3.32         | 0.07 | 1.33      | 0.06 | 1.04      | 0.04 | 5.90              | 0.10 | 0.56                   | 0.01 | 0.44                         | 0.01 | 0.78                    | 0.03 |
| II    | 800             | 20 | 76           | 17 | 1.51         | 0.07 | 2.68               | 0.05 | 3.49         | 0.07 | 1.39      | 0.05 | 1.08      | 0.04 | 6.16              | 0.09 | 0.57                   | 0.01 | 0.43                         | 0.01 | 0.77                    | 0.02 |
| II    | 1000            | 14 | 90           | 9  | 1.54         | 0.09 | 2.67               | 0.06 | 3.25         | 0.16 | 1.45      | 0.07 | 1.07      | 0.06 | 5.92              | 0.15 | 0.54                   | 0.02 | 0.46                         | 0.02 | 0.88                    | 0.10 |
| II    | 1200            | 20 | 81           | 10 | 1.73         | 0.05 | 2.39               | 0.04 | 3.41         | 0.07 | 1.30      | 0.08 | 1.07      | 0.03 | 5.81              | 0.09 | 0.59                   | 0.01 | 0.41                         | 0.01 | 0.70                    | 0.02 |
| II    | 2000            | 15 | 96           | 4  | 1.60         | 0.08 | 2.56               | 0.06 | 3.56         | 0.07 | 1.37      | 0.06 | 1.05      | 0.04 | 6.12              | 0.10 | 0.58                   | 0.01 | 0.42                         | 0.01 | 0.72                    | 0.02 |
| II    | 3000            | 15 | 63           | 8  | 1.58         | 0.06 | 2.39               | 0.06 | 3.30         | 0.07 | 1.33      | 0.05 | 1.02      | 0.03 | 5.69              | 0.10 | 0.58                   | 0.01 | 0.42                         | 0.01 | 0.73                    | 0.02 |
| III   | 400             | 15 | 61           | 10 | 1.97         | 0.07 | 2.92               | 0.05 | 3.76         | 0.07 | 1.63      | 0.08 | 1.48      | 0.06 | 6.68              | 0.09 | 0.56                   | 0.01 | 0.44                         | 0.01 | 0.78                    | 0.02 |
| III   | 600             | 15 | 87           | 10 | 1.85         | 0.12 | 2.78               | 0.14 | 3.61         | 0.15 | 1.50      | 0.11 | 1.41      | 0.08 | 6.39              | 0.28 | 0.57                   | 0.01 | 0.43                         | 0.01 | 0.77                    | 0.02 |
| III   | 800             | 20 | 76           | 9  | 1.90         | 0.10 | 2.97               | 0.05 | 3.85         | 0.08 | 1.73      | 0.06 | 1.52      | 0.03 | 6.81              | 0.08 | 0.56                   | 0.01 | 0.44                         | 0.01 | 0.78                    | 0.03 |
| III   | 1000            | 20 | 59           | 9  | 1.86         | 0.05 | 3.01               | 0.04 | 3.74         | 0.08 | 1.69      | 0.05 | 1.48      | 0.04 | 6.75              | 0.09 | 0.55                   | 0.01 | 0.45                         | 0.01 | 0.81                    | 0.02 |
| III   | 1200            | 20 | 86           | 7  | 1.97         | 0.07 | 2.93               | 0.05 | 3.60         | 0.06 | 1.68      | 0.03 | 1.50      | 0.04 | 6.54              | 0.09 | 0.55                   | 0.00 | 0.45                         | 0.00 | 0.82                    | 0.01 |
| III   | 2000            | 14 | 78           | 9  | 2.01         | 0.09 | 3.08               | 0.04 | 3.81         | 0.07 | 1.68      | 0.03 | 1.56      | 0.05 | 6.88              | 0.09 | 0.55                   | 0.00 | 0.45                         | 0.00 | 0.81                    | 0.01 |
| III   | 3000            | 15 | 71           | 10 | 1.69         | 0.10 | 3.15               | 0.04 | 3.83         | 0.05 | 1.67      | 0.05 | 1.47      | 0.05 | 6.97              | 0.08 | 0.55                   | 0.00 | 0.45                         | 0.00 | 0.82                    | 0.01 |
| IV    | 400             | 6  | 23           | 3  | 1.94         | 0.13 | 3.79               | 0.08 | 4.15         | 0.09 | 1.76      | 0.32 | 3.21      | 0.19 | 7.94              | 0.09 | 0.52                   | 0.01 | 0.48                         | 0.01 | 0.92                    | 0.03 |
| IV    | 600             | 5  | 33           | 9  | 1.95         | 0.08 | 3.71               | 0.08 | 4.00         | 0.21 | 1.84      | 0.04 | 3.18      | 0.17 | 7.72              | 0.29 | 0.52                   | 0.01 | 0.48                         | 0.01 | 0.93                    | 0.03 |
| IV    | 800             | 6  | 37           | 9  | 2.17         | 0.08 | 3.78               | 0.04 | 4.43         | 0.11 | 1.83      | 0.13 | 3.29      | 0.06 | 8.21              | 0.15 | 0.54                   | 0.00 | 0.46                         | 0.00 | 0.86                    | 0.02 |
| IV    | 1000            | 6  | 30           | 12 | 2.02         | 0.10 | 3.64               | 0.07 | 3.76         | 0.06 | 2.11      | 0.09 | 3.00      | 0.06 | 7.40              | 0.08 | 0.51                   | 0.01 | 0.49                         | 0.01 | 0.97                    | 0.03 |
| IV    | 1200            | 8  | 30           | 4  | 2.04         | 0.11 | 3.65               | 0.08 | 3.86         | 0.12 | 2.07      | 0.07 | 3.09      | 0.09 | 7.51              | 0.18 | 0.51                   | 0.01 | 0.49                         | 0.01 | 0.95                    | 0.02 |
| IV    | 2000            | 5  | 10           | 6  | 1.96         | 0.05 | 3.64               | 0.08 | 3.71         | 0.13 | 1.92      | 0.08 | 2.82      | 0.33 | 7.36              | 0.19 | 0.50                   | 0.01 | 0.50                         | 0.01 | 0.98                    | 0.03 |
| IV    | 3000            | 6  | 6            | 6  | 1.81         | 0.13 | 3.73               | 0.05 | 4.01         | 0.10 | 2.24      | 0.08 | 2.99      | 0.10 | 7.74              | 0.11 | 0.52                   | 0.01 | 0.48                         | 0.01 | 0.93                    | 0.03 |
| V     | 400             | 5  | 0            | 0  | 2.11         | 0.06 | 4.53               | 0.07 | 4.63         | 0.12 | 2.74      | 0.09 | 4.59      | 0.20 | 9.16              | 0.14 | 0.51                   | 0.01 | 0.49                         | 0.01 | 0.98                    | 0.03 |
| V     | 600             | 6  | 7            | 7  | 2.22         | 0.11 | 4.51               | 0.12 | 4.71         | 0.18 | 2.54      | 0.11 | 4.43      | 0.21 | 9.22              | 0.30 | 0.51                   | 0.00 | 0.49                         | 0.00 | 0.96                    | 0.01 |
| V     | 800             | 6  | 7            | 7  | 1.90         | 0.10 | 4.74               | 0.12 | 4.91         | 0.17 | 2.67      | 0.10 | 4.50      | 0.16 | 9.65              | 0.27 | 0.51                   | 0.00 | 0.49                         | 0.00 | 0.97                    | 0.02 |
| V     | 1000            | 6  | 7            | 7  | 2.23         | 0.07 | 4.63               | 0.18 | 4.81         | 0.17 | 2.57      | 0.15 | 4.80      | 0.24 | 9.44              | 0.31 | 0.51                   | 0.01 | 0.49                         | 0.01 | 0.96                    | 0.03 |
| V     | 1200            | 8  | 0            | 0  | 2.10         | 0.11 | 4.49               | 0.11 | 4.90         | 0.15 | 2.44      | 0.12 | 3.86      | 0.29 | 9.38              | 0.25 | 0.52                   | 0.00 | 0.48                         | 0.00 | 0.92                    | 0.01 |

**Table S2:** Mineral contents in the cephalothorax for each  $p\text{CO}_2$  condition of exposure at each stage of development.

| Stage | $p\text{CO}_2$ | n | $\text{Ca}^{2+}$ (mg g <sup>-1</sup> DW) |         | $\text{Mg}^{2+}$ (mg g <sup>-1</sup> DW) |         | $\text{Na}^+$ (mg g <sup>-1</sup> DW) |         | $\text{K}^+$ (mg g <sup>-1</sup> DW) |         | $\text{Sr}^+$ (mg g <sup>-1</sup> DW) |        | [ $\text{Mg}^{2+}$ ]:[ $\text{Ca}^{2+}$ ] |        | [ $\text{Ca}^{2+}$ ]:[ $\text{Mg}^{2+}$ ] |        |
|-------|----------------|---|------------------------------------------|---------|------------------------------------------|---------|---------------------------------------|---------|--------------------------------------|---------|---------------------------------------|--------|-------------------------------------------|--------|-------------------------------------------|--------|
|       |                |   | mean                                     | SE      | mean                                     | SE      | mean                                  | SE      | mean                                 | SE      | mean                                  | SE     | mean                                      | SE     | mean                                      | SE     |
| I     | 400            | 3 | 78.35                                    | ± 22.69 | 40.85                                    | ± 14.69 | 153.50                                | ± 14.51 | 33.22                                | ± 8.26  | 1.13                                  | ± 0.27 | 0.50                                      | ± 0.03 | 2.04                                      | ± 0.13 |
| I     | 600            | 3 | 48.07                                    | ± 22.72 | 13.40                                    | ± 6.52  | 62.80                                 | ± 30.13 | 26.84                                | ± 13.03 | 0.71                                  | ± 0.39 | 0.23                                      | ± 0.06 | 5.11                                      | ± 1.57 |
| I     | 800            | 4 | 59.86                                    | ± 11.42 | 16.51                                    | ± 3.56  | 80.52                                 | ± 20.29 | 32.30                                | ± 6.24  | 0.75                                  | ± 0.15 | 0.27                                      | ± 0.01 | 3.70                                      | ± 0.18 |
| I     | 1000           | 4 | 103.28                                   | ± 25.96 | 23.61                                    | ± 3.14  | 112.84                                | ± 17.54 | 38.88                                | ± 3.50  | 1.70                                  | ± 0.40 | 0.25                                      | ± 0.03 | 4.25                                      | ± 0.55 |
| I     | 1200           | 4 | 67.35                                    | ± 18.77 | 20.55                                    | ± 4.27  | 133.40                                | ± 13.28 | 44.75                                | ± 7.73  | 0.96                                  | ± 0.25 | 0.37                                      | ± 0.10 | 3.17                                      | ± 0.63 |
| I     | 2000           | 3 | 79.73                                    | ± 31.56 | 15.11                                    | ± 4.59  | 72.66                                 | ± 20.68 | 21.16                                | ± 4.48  | 1.26                                  | ± 0.52 | 0.23                                      | ± 0.05 | 4.76                                      | ± 0.87 |
| I     | 3000           | 4 | 38.57                                    | ± 8.25  | 12.75                                    | ± 2.35  | 74.83                                 | ± 17.39 | 24.10                                | ± 5.37  | 0.55                                  | ± 0.09 | 0.35                                      | ± 0.06 | 3.12                                      | ± 0.61 |
| II    | 400            | 3 | 121.07                                   | ± 40.07 | 25.13                                    | ± 7.17  | 106.96                                | ± 29.20 | 37.31                                | ± 9.11  | 2.05                                  | ± 0.67 | 0.22                                      | ± 0.01 | 4.68                                      | ± 0.26 |
| II    | 600            | 3 | 99.05                                    | ± 10.17 | 19.84                                    | ± 2.93  | 95.48                                 | ± 20.79 | 29.41                                | ± 3.04  | 1.70                                  | ± 0.20 | 0.20                                      | ± 0.01 | 5.07                                      | ± 0.26 |
| II    | 800            | 4 | 131.37                                   | ± 59.47 | 30.38                                    | ± 11.63 | 153.49                                | ± 39.28 | 59.36                                | ± 21.01 | 2.38                                  | ± 1.10 | 0.47                                      | ± 0.25 | 3.72                                      | ± 0.97 |
| II    | 1000           | 3 | 98.12                                    | ± 35.02 | 23.78                                    | ± 4.93  | 112.68                                | ± 2.14  | 40.76                                | ± 3.23  | 1.65                                  | ± 0.68 | 0.29                                      | ± 0.06 | 3.82                                      | ± 0.74 |
| II    | 1200           | 4 | 83.44                                    | ± 17.79 | 18.50                                    | ± 3.30  | 80.37                                 | ± 11.67 | 33.13                                | ± 6.63  | 1.53                                  | ± 0.32 | 0.23                                      | ± 0.02 | 4.45                                      | ± 0.43 |
| II    | 2000           | 3 | 62.82                                    | ± 5.93  | 12.18                                    | ± 1.41  | 60.84                                 | ± 7.99  | 20.30                                | ± 1.05  | 1.09                                  | ± 0.13 | 0.19                                      | ± 0.01 | 5.18                                      | ± 0.15 |
| II    | 3000           | 3 | 63.85                                    | ± 19.90 | 13.80                                    | ± 3.43  | 55.11                                 | ± 14.15 | 24.73                                | ± 7.59  | 1.11                                  | ± 0.35 | 0.23                                      | ± 0.02 | 4.50                                      | ± 0.34 |
| III   | 400            | 3 | 83.87                                    | ± 18.17 | 13.87                                    | ± 4.04  | 63.58                                 | ± 13.64 | 22.45                                | ± 9.19  | 1.42                                  | ± 0.32 | 0.16                                      | ± 0.01 | 6.35                                      | ± 0.51 |
| III   | 600            | 3 | 101.58                                   | ± 20.43 | 16.84                                    | ± 3.16  | 76.09                                 | ± 17.80 | 29.00                                | ± 5.04  | 1.77                                  | ± 0.35 | 0.17                                      | ± 0.00 | 6.01                                      | ± 0.16 |
| III   | 800            | 4 | 60.31                                    | ± 10.71 | 10.76                                    | ± 2.28  | 39.26                                 | ± 6.89  | 20.60                                | ± 4.82  | 1.11                                  | ± 0.21 | 0.17                                      | ± 0.01 | 5.78                                      | ± 0.33 |
| III   | 1000           | 4 | 112.36                                   | ± 49.08 | 19.53                                    | ± 8.43  | 82.37                                 | ± 31.14 | 33.03                                | ± 16.55 | 1.98                                  | ± 0.86 | 0.17                                      | ± 0.01 | 5.85                                      | ± 0.36 |
| III   | 1200           | 4 | 142.75                                   | ± 83.78 | 26.85                                    | ± 16.08 | 106.17                                | ± 62.43 | 53.67                                | ± 32.89 | 2.63                                  | ± 1.56 | 0.19                                      | ± 0.01 | 5.33                                      | ± 0.24 |
| III   | 2000           | 3 | 60.05                                    | ± 2.65  | 9.90                                     | ± 0.55  | 42.68                                 | ± 4.69  | 18.21                                | ± 1.39  | 1.05                                  | ± 0.03 | 0.17                                      | ± 0.01 | 6.10                                      | ± 0.40 |
| III   | 3000           | 3 | 110.01                                   | ± 28.80 | 19.06                                    | ± 6.26  | 79.32                                 | ± 26.15 | 35.07                                | ± 12.96 | 1.94                                  | ± 0.53 | 0.17                                      | ± 0.01 | 5.99                                      | ± 0.52 |
| IV    | 400            | 3 | 197.57                                   | ± 82.45 | 18.08                                    | ± 5.66  | 40.62                                 | ± 6.25  | 14.10                                | ± 3.40  | 3.12                                  | ± 1.28 | 0.11                                      | ± 0.02 | 10.03                                     | ± 1.84 |
| IV    | 600            | 3 | 565.94                                   | ± 88.02 | 48.08                                    | ± 33.17 | 70.85                                 | ± 44.73 | 18.98                                | ± 12.03 | 8.90                                  | ± 6.06 | 0.08                                      | ± 0.00 | 11.81                                     | ± 0.30 |
| IV    | 800            | 3 | 291.77                                   | ± 79.99 | 24.79                                    | ± 6.88  | 47.01                                 | ± 11.88 | 14.11                                | ± 3.56  | 4.66                                  | ± 1.35 | 0.08                                      | ± 0.00 | 11.81                                     | ± 0.42 |
| IV    | 1000           | 3 | 259.40                                   | ± 94.96 | 22.34                                    | ± 7.88  | 46.10                                 | ± 11.28 | 10.16                                | ± 2.80  | 4.01                                  | ± 1.47 | 0.09                                      | ± 0.00 | 11.52                                     | ± 0.16 |
| IV    | 1200           | 3 | 240.06                                   | ± 94.81 | 20.19                                    | ± 7.35  | 33.67                                 | ± 11.00 | 9.26                                 | ± 3.75  | 3.82                                  | ± 1.53 | 0.09                                      | ± 0.00 | 11.57                                     | ± 0.49 |
| IV    | 2000           | 2 | 145.78                                   | ± 30.68 | 12.45                                    | ± 1.78  | 24.21                                 | ± 0.08  | 5.79                                 | ± 0.38  | 2.28                                  | ± 0.49 | 0.09                                      | ± 0.01 | 11.60                                     | ± 0.81 |
| IV    | 3000           | 3 | 306.36                                   | ± 59.27 | 29.40                                    | ± 6.26  | 60.34                                 | ± 8.56  | 13.90                                | ± 2.09  | 4.80                                  | ± 0.92 | 0.10                                      | ± 0.00 | 10.49                                     | ± 0.36 |
| V     | 400            | 3 | 165.41                                   | ± 49.98 | 17.59                                    | ± 6.08  | 21.17                                 | ± 4.02  | 7.55                                 | ± 3.25  | 2.48                                  | ± 0.73 | 0.10                                      | ± 0.00 | 9.65                                      | ± 0.44 |
| V     | 600            | 3 | 343.69                                   | ± 68.00 | 33.16                                    | ± 8.20  | 36.14                                 | ± 12.60 | 14.73                                | ± 5.09  | 5.26                                  | ± 1.04 | 0.09                                      | ± 0.01 | 10.73                                     | ± 0.75 |
| V     | 800            | 3 | 226.97                                   | ± 44.46 | 24.56                                    | ± 5.51  | 34.09                                 | ± 9.14  | 12.61                                | ± 3.12  | 3.45                                  | ± 0.70 | 0.11                                      | ± 0.00 | 9.37                                      | ± 0.31 |
| V     | 1000           | 3 | 227.39                                   | ± 22.18 | 21.69                                    | ± 2.13  | 22.26                                 | ± 3.93  | 9.84                                 | ± 1.57  | 3.37                                  | ± 0.34 | 0.10                                      | ± 0.01 | 10.51                                     | ± 0.58 |
| V     | 1200           | 4 | 283.52                                   | ± 47.16 | 25.24                                    | ± 3.50  | 33.66                                 | ± 2.44  | 12.98                                | ± 1.77  | 4.30                                  | ± 0.73 | 0.09                                      | ± 0.01 | 11.12                                     | ± 0.75 |

**Table S3:** Resting metabolic rates (individual and mass normalized) for each  $p\text{CO}_2$  condition of exposure at each stage of development.  $n = 20$  for larval stages I, II, III and  $n = 6$  for postlarvae (stage IV) and juveniles (stage V).

| Stage | $p\text{CO}_2$ | Resting Metabolic Rate ( $\mu\text{mol O}_2 \text{ h}^{-1}$ ) |            | Resting Metabolic Rate (Mass Normalized)<br>( $\mu\text{mol O}_2 \text{ g}^{-1}\text{WBM h}^{-1}$ ) |            |
|-------|----------------|---------------------------------------------------------------|------------|-----------------------------------------------------------------------------------------------------|------------|
|       |                | Mean                                                          | SE         | Mean                                                                                                | SE         |
| I     | 400            | 0.13                                                          | $\pm 0.01$ | 17.81                                                                                               | $\pm 1.32$ |
| I     | 600            | 0.16                                                          | $\pm 0.01$ | 21.90                                                                                               | $\pm 0.98$ |
| I     | 800            | 0.15                                                          | $\pm 0.01$ | 19.90                                                                                               | $\pm 1.59$ |
| I     | 1000           | 0.15                                                          | $\pm 0.01$ | 16.93                                                                                               | $\pm 1.41$ |
| I     | 1200           | 0.15                                                          | $\pm 0.01$ | 19.90                                                                                               | $\pm 1.44$ |
| I     | 2000           | 0.14                                                          | $\pm 0.01$ | 19.64                                                                                               | $\pm 1.33$ |
| I     | 3000           | 0.13                                                          | $\pm 0.01$ | 18.00                                                                                               | $\pm 1.99$ |
| II    | 400            | 0.19                                                          | $\pm 0.02$ | 17.08                                                                                               | $\pm 2.11$ |
| II    | 600            | 0.16                                                          | $\pm 0.01$ | 15.50                                                                                               | $\pm 0.89$ |
| II    | 800            | 0.17                                                          | $\pm 0.02$ | 15.95                                                                                               | $\pm 1.39$ |
| II    | 1000           | 0.17                                                          | $\pm 0.02$ | 15.41                                                                                               | $\pm 1.96$ |
| II    | 1200           | 0.18                                                          | $\pm 0.01$ | 17.94                                                                                               | $\pm 1.11$ |
| II    | 2000           | 0.24                                                          | $\pm 0.10$ | 16.50                                                                                               | $\pm 3.43$ |
| II    | 3000           | 0.20                                                          | $\pm 0.02$ | 18.96                                                                                               | $\pm 1.66$ |
| III   | 400            | 0.17                                                          | $\pm 0.02$ | 11.22                                                                                               | $\pm 1.30$ |
| III   | 600            | 0.18                                                          | $\pm 0.02$ | 11.09                                                                                               | $\pm 1.22$ |
| III   | 800            | 0.32                                                          | $\pm 0.02$ | 18.29                                                                                               | $\pm 1.01$ |
| III   | 1000           | 0.16                                                          | $\pm 0.02$ | 10.70                                                                                               | $\pm 1.69$ |
| III   | 1200           | 0.28                                                          | $\pm 0.02$ | 16.49                                                                                               | $\pm 1.02$ |
| III   | 2000           | 0.32                                                          | $\pm 0.03$ | 18.04                                                                                               | $\pm 1.06$ |
| III   | 3000           | 0.31                                                          | $\pm 0.02$ | 18.49                                                                                               | $\pm 1.22$ |
| IV    | 400            | 0.21                                                          | $\pm 0.02$ | 6.40                                                                                                | $\pm 0.67$ |
| IV    | 600            | 0.62                                                          | $\pm 0.11$ | 18.49                                                                                               | $\pm 1.87$ |
| IV    | 800            | 0.23                                                          | $\pm 0.04$ | 6.90                                                                                                | $\pm 1.23$ |
| IV    | 1000           | 0.35                                                          | $\pm 0.05$ | 12.87                                                                                               | $\pm 1.56$ |
| IV    | 1200           | 0.56                                                          | $\pm 0.10$ | 18.48                                                                                               | $\pm 3.05$ |
| IV    | 2000           | 0.46                                                          | $\pm 0.03$ | 14.87                                                                                               | $\pm 1.45$ |
| IV    | 3000           | 0.28                                                          | $\pm 0.03$ | 8.96                                                                                                | $\pm 1.06$ |
| V     | 400            | 0.63                                                          | $\pm 0.14$ | 10.94                                                                                               | $\pm 2.14$ |
| V     | 600            | 0.68                                                          | $\pm 0.06$ | 12.03                                                                                               | $\pm 0.93$ |
| V     | 800            | 0.88                                                          | $\pm 0.14$ | 14.24                                                                                               | $\pm 2.19$ |
| V     | 1000           | 0.80                                                          | $\pm 0.09$ | 12.80                                                                                               | $\pm 1.54$ |
| V     | 1200           | 0.73                                                          | $\pm 0.09$ | 13.17                                                                                               | $\pm 1.32$ |

**Table S4:** Models testing the responses of life-history and physiological traits to  $p\text{CO}_2$  and stage (+ covariate when needed). AIC,  $R^2$  and adjusted  $R^2$  are given for each equation. Bold  $R^2$  shows the best fitted model based on AIC selection for each trait, following the rule of parsimony when AIC differ for less than a value of 2: i.e. when AIC are comparable the simpler model was consider as the best-fit model.

|                                              | Linear<br>lm(days~covariate +<br>pCO2*stage |                                          | Logarithmic<br>lm(days~ covariate +<br>log(pCO2)*stage |                                          | Polynomial (2 <sup>nd</sup> degree)<br>lm(days~ covariate +<br>poly(pCO2,2)*stage |                                          | Polynomial (3 <sup>rd</sup> degree)<br>lm(days~ covariate +<br>poly(pCO2,3)*stage |                                          |
|----------------------------------------------|---------------------------------------------|------------------------------------------|--------------------------------------------------------|------------------------------------------|-----------------------------------------------------------------------------------|------------------------------------------|-----------------------------------------------------------------------------------|------------------------------------------|
|                                              | AIC                                         | R <sup>2</sup> (R <sup>2</sup> adjusted) | AIC                                                    | R <sup>2</sup> (R <sup>2</sup> adjusted) | AIC                                                                               | R <sup>2</sup> (R <sup>2</sup> adjusted) | AIC                                                                               | R <sup>2</sup> (R <sup>2</sup> adjusted) |
| Developmental time                           | 1011.82                                     | <b>0.126 (0.113)</b>                     | 1016.10                                                | 0.108 (0.094)                            | 1009.99                                                                           | 0.152 (0.130)                            | 1011.52                                                                           | 0.162 (0.131)                            |
| Morphometrics                                |                                             |                                          |                                                        |                                          |                                                                                   |                                          |                                                                                   |                                          |
| Total length (Lt)                            | 995.84                                      | <b>0.847 (0.843)</b>                     | 994.95                                                 | 0.847 (0.844)                            | 995.18                                                                            | 0.850 (0.845)                            | 1000.00                                                                           | 0.852 (0.845)                            |
| ceph/Lt                                      | -1975.61                                    | <b>0.475 (0.464)</b>                     | -1975.11                                               | 0.475 (0.464)                            | -1972.90                                                                          | 0.484 (0.467)                            | -1974.07                                                                          | 0.497 (0.474)                            |
| abd/Lt                                       | -1909.59                                    | 0.194 (0.177)                            | -1911.81                                               | <b>0.198 (0.181)</b>                     | -1908.69                                                                          | 0.211 (0.185)                            | -1901.40                                                                          | 0.216 (0.180)                            |
| ceph/abd                                     | -712.68                                     | <b>0.384 (0.371)</b>                     | -712.08                                                | 0.383 (0.370)                            | -707.45                                                                           | 0.390 (0.370)                            | -705.46                                                                           | 0.401 (0.374)                            |
| Rostrum                                      | 15.47                                       | <b>0.501 (0.489)</b>                     | 17.73                                                  | 0.498 (0.487)                            | 16.70                                                                             | 0.511 (0.494)                            | 17.22                                                                             | 0.522 (0.498)                            |
| Cephalothorax                                | -95.18                                      | <b>0.925 (0.924)</b>                     | -94.43                                                 | 0.925 (0.923)                            | -94.80                                                                            | 0.927 (0.924)                            | -96.56                                                                            | 0.929 (0.925)                            |
| Abdomen                                      | -15.92                                      | 0.875 (0.872)                            | -19.39                                                 | <b>0.876 (0.873)</b>                     | -18.93                                                                            | 0.878 (0.874)                            | -11.69                                                                            | 0.879 (0.873)                            |
| Tail                                         | -86.87                                      | 0.739 (0.733)                            | -89.67                                                 | <b>0.741 (0.735)</b>                     | -81.39                                                                            | 0.742 (0.732)                            | -75.28                                                                            | 0.744 (0.732)                            |
| log(Claw)                                    | -373.78                                     | <b>0.918 (0.916)</b>                     | -374.73                                                | 0.918 (0.916)                            | -367.17                                                                           | 0.919 (0.916)                            | -364.47                                                                           | 0.920 (0.916)                            |
| Mineralisation                               |                                             |                                          |                                                        |                                          |                                                                                   |                                          |                                                                                   |                                          |
| log[Ca <sup>2+</sup> ]                       | 201.30                                      | <b>0.476 (0.421)</b>                     | 202.01                                                 | 0.472 (0.417)                            | 209.73                                                                            | 0.483 (0.397)                            | 216.15                                                                            | 0.501 (0.383)                            |
| log[Mg <sup>2+</sup> ]                       | 166.35                                      | <b>0.225 (0.143)</b>                     | 164.97                                                 | 0.235 (0.154)                            | 172.14                                                                            | 0.255 (0.131)                            | 176.70                                                                            | 0.292 (0.126)                            |
| log[Na <sup>+</sup> ]                        | 150.72                                      | <b>0.575 (0.529)</b>                     | 152.26                                                 | 0.568 (0.523)                            | 156.84                                                                            | 0.590 (0.521)                            | 161.83                                                                            | 0.609 (0.516)                            |
| log[K <sup>+</sup> ]                         | 170.01                                      | <b>0.564 (0.518)</b>                     | 171.66                                                 | 0.557 (0.510)                            | 174.36                                                                            | 0.586 (0.518)                            | 175.12                                                                            | 0.621 (0.532)                            |
| log[Sr <sup>+</sup> ]                        | 208.42                                      | <b>0.451 (0.393)</b>                     | 209.07                                                 | 0.448 (0.390)                            | 216.90                                                                            | 0.459 (0.369)                            | 223.14                                                                            | 0.478 (0.355)                            |
| [Mg <sup>2+</sup> ]:[Ca <sup>2+</sup> ]      | -249.57                                     | 0.6502 (0.613)                           | -255.70                                                | 0.6701 (0.635)                           | -263.28                                                                           | <b>0.7209 (0.674)</b>                    | -258.05                                                                           | 0.7333 (0.670)                           |
| Feeding rate                                 | 392.44                                      | <b>0.133 (0.069)</b>                     | 392.21                                                 | 0.137 (0.073)                            | 394.88                                                                            | 0.156 (0.059)                            |                                                                                   | <b>0.308 (0.197)</b>                     |
| Resting metabolic rate<br>(MO <sub>2</sub> ) | -751.02                                     | 0.746 (0.740)                            | -750.84                                                | 0.746 (0.740)                            | -756.62                                                                           | <b>0.755 (0.746)</b>                     | -752.69                                                                           | 0.759 (0.746)                            |

**Table S5** ANOVA and post-hoc Tukey HSD results assessing the effects of ocean acidification ( $p\text{CO}_2$  concentration groups: 1 – 400  $\mu\text{atm}$ ; 2 – 600  $\mu\text{atm}$ ; 3 – 800  $\mu\text{atm}$ ; 4 – 1000  $\mu\text{atm}$ ; 5 – 1200  $\mu\text{atm}$ ; 6 – 2000  $\mu\text{atm}$ ; 7 – 3000  $\mu\text{atm}$ ) in stage I larvae. Only significant metabolites are included in the table.

| Metabolite            | Fvalue | p value  | -log10(p) | FDR        | Tukey's HSD                            |
|-----------------------|--------|----------|-----------|------------|----------------------------------------|
| C20.1                 | 10.496 | 2.30E-07 | 6.6391    | 1.29E-05   | 2-1; 3-1; 5-1; 6-1; 7-1; 6-4; 7-4      |
| C11.0                 | 9.4508 | 8.37E-07 | 6.0774    | 2.34E-05   | 4-1; 5-1; 6-1; 7-1; 5-3; 6-3; 7-3      |
| C17.1                 | 8.8354 | 1.85E-06 | 5.7323    | 3.46E-05   | 2-1; 3-1; 4-1; 5-1; 6-1; 7-1           |
| C20.5                 | 7.4864 | 1.16E-05 | 4.9359    | 0.00016225 | 2-1; 3-1; 4-1; 5-1; 6-1; 7-1           |
| Betaine               | 7.11   | 1.98E-05 | 4.7033    | 0.00019532 | 4-1; 5-1; 6-1; 7-1; 4-2; 5-2; 6-2; 7-2 |
| Phospho.L.Arginine    | 7.0716 | 2.09E-05 | 4.6793    | 0.00019532 | 3-1; 4-1; 5-1; 6-1; 7-1; 6-2           |
| C14.0                 | 6.9389 | 2.54E-05 | 4.5959    | 0.00019974 | 2-1; 3-1; 4-1; 5-1; 6-1; 7-1           |
| C22.6                 | 6.8358 | 2.95E-05 | 4.5308    | 0.00019974 | 2-1; 3-1; 4-1; 5-1; 6-1; 7-1           |
| C15.0                 | 6.777  | 3.21E-05 | 4.4935    | 0.00019974 | 2-1; 3-1; 4-1; 5-1; 6-1; 7-1           |
| C8.0                  | 6.5098 | 4.76E-05 | 4.3223    | 0.00026659 | 2-1; 3-1; 4-1; 5-1; 6-1; 7-1           |
| C20.4                 | 5.7678 | 0.0001   | 3.8338    | 0.0007045  | 2-1; 3-1; 5-1; 6-1                     |
| C20.2                 | 5.7011 | 0.0002   | 3.7889    | 0.0007045  | 2-1; 3-1; 4-1; 5-1; 6-1; 7-1           |
| C15.1                 | 5.6974 | 0.0002   | 3.7864    | 0.0007045  | 2-1; 4-1; 5-1; 6-1; 7-1; 5-3           |
| Succinate             | 5.4579 | 0.0002   | 3.6238    | 0.00095127 | 3-1; 4-1; 5-1; 6-1; 5-2                |
| ATP                   | 5.34   | 0.0003   | 3.5429    | 0.0010269  | 3-1; 5-3; 6-3; 7-3                     |
| C18.3                 | 5.3248 | 0.0003   | 3.5325    | 0.0010269  | 2-1; 3-1; 4-1; 6-1; 7-1                |
| C10.0                 | 4.8863 | 0.0006   | 3.2272    | 0.0019523  | 2-1; 3-1; 4-1; 5-1; 6-1; 7-1           |
| C20.3                 | 4.6966 | 0.0008   | 3.0929    | 0.0025121  | 2-1; 3-1; 5-1; 6-1; 7-1                |
| C12.0                 | 4.6195 | 0.0009   | 3.0379    | 0.0027011  | 3-1; 4-1; 5-1; 6-1; 7-1                |
| C16.0                 | 4.4369 | 0.0012   | 2.9069    | 0.0034693  | 4-1; 5-1; 5-3                          |
| a.ketoglutaric.acid   | 4.2124 | 0.0018   | 2.7442    | 0.0048054  | 2-1; 4-1                               |
| Valine                | 3.8722 | 0.0032   | 2.4944    | 0.0081539  | 5-3; 5-4; 6-5; 7-5                     |
| C18.1                 | 3.8086 | 0.0036   | 2.4473    | 0.0086255  | 2-1; 3-1; 4-1; 5-1; 6-1; 7-1           |
| NAD                   | 3.7883 | 0.0037   | 2.4322    | 0.0086255  | 3-1; 6-1; 7-1                          |
| AMP                   | 3.5234 | 0.0058   | 2.2344    | 0.013056   | 2-1; 4-1; 6-1; 7-1                     |
| C22.1                 | 3.4618 | 0.0065   | 2.1881    | 0.013967   | 3-1; 4-1; 7-1                          |
| C18.2                 | 3.4285 | 0.0069   | 2.163     | 0.014249   | 2-1; 6-1; 7-1                          |
| Malate                | 3.3963 | 0.0073   | 2.1388    | 0.01453    | 2-1; 3-1                               |
| C13.0                 | 3.1207 | 0.0117   | 1.93      | 0.022686   | 2-1; 3-1; 4-1; 5-1; 7-1                |
| 8.Oxo.2.dexyguanosine | 2.8749 | 0.0181   | 1.7426    | 0.033767   | 2-1; 3-1; 4-1; 5-1; 6-1; 7-1           |

|                    |        |        |        |          |          |
|--------------------|--------|--------|--------|----------|----------|
| Cystine            | 2.8282 | 0.0196 | 1.7068 | 0.035482 | 6-1; 7-1 |
| a.Glycerophosphate | 2.7281 | 0.0234 | 1.6302 | 0.04101  | 5-1; 7-1 |

**Table S6.** ANOVA and Tukey HSD post-hoc results assessing the effects of ocean acidification ( $p\text{CO}_2$  concentration groups: 1 – 400  $\mu\text{atm}$ ; 2 – 600  $\mu\text{atm}$ ; 3 – 800  $\mu\text{atm}$ ; 4 – 1000  $\mu\text{atm}$ ; 5 – 1200  $\mu\text{atm}$ ; 6 – 2000  $\mu\text{atm}$ ; 7 – 3000  $\mu\text{atm}$ ) in stage II larvae. Only significant metabolites are included in the table.

| Metabolite          | Fvalue | p value   | -log10(p) | FDR       | Tukey's HSD                        |
|---------------------|--------|-----------|-----------|-----------|------------------------------------|
| C20.5               | 8.993  | 3.5109E-6 | 5.4546    | 1.615E-4  | 7-1; 7-2; 7-3; 7-4; 7-5; 7-6       |
| C18.1               | 6.4646 | 8.5935E-5 | 4.0658    | 0.0016617 | 7-1; 7-2; 7-3; 7-4; 7-5; 7-6       |
| C20.4               | 6.2955 | 1.0837E-4 | 3.9651    | 0.0016617 | 7-1; 7-2; 7-3; 7-4; 7-5; 7-6       |
| C18.2               | 5.9621 | 1.7242E-4 | 3.7634    | 0.0019828 | 7-1; 7-2; 7-3; 7-4; 7-5; 7-6       |
| a.ketoglutaric.acid | 5.5877 | 2.9386E-4 | 3.5319    | 0.002465  | 7-1; 7-2; 7-3; 7-4; 7-5; 7-6       |
| C17.0               | 5.4259 | 3.7146E-4 | 3.4301    | 0.002465  | 7-1; 7-2; 7-3; 7-4; 7-5; 7-6       |
| C16.1               | 5.4191 | 3.7511E-4 | 3.4258    | 0.002465  | 7-1; 7-2; 7-3; 7-4; 7-5; 7-6       |
| Malate              | 5.1605 | 5.4833E-4 | 3.261     | 0.0030892 | 7-1; 7-2; 7-3; 7-4; 7-5; 7-6       |
| C20.3               | 5.0851 | 6.1321E-4 | 3.2124    | 0.0030892 | 7-1; 7-3; 7-5; 7-6                 |
| C18.3               | 5.0241 | 6.7157E-4 | 3.1729    | 0.0030892 | 7-1; 7-2; 7-3; 7-4; 7-5; 7-6       |
| Fumarate            | 4.2011 | 0.0023665 | 2.6259    | 0.0098963 | 7-2; 7-3; 7-5; 7-6                 |
| C20.2               | 4.0048 | 0.0032256 | 2.4914    | 0.012365  | 7-1; 7-2; 7-3; 7-4; 7-6            |
| Alanine             | 3.8937 | 0.003849  | 2.4146    | 0.013088  | 5-1                                |
| Lactate             | 3.8723 | 0.0039832 | 2.3998    | 0.013088  | 5-3; 5-4                           |
| Sarcosine           | 3.3993 | 0.0085625 | 2.0674    | 0.026258  | no significant pairwise comparisor |
| C22.6               | 3.303  | 0.010027  | 1.9988    | 0.028828  | 7-1; 7-2; 7-3; 7-4; 7-6            |
| Phospho.L.Arginine  | 3.2648 | 0.010678  | 1.9715    | 0.028893  | 7-3                                |
| Methionine          | 2.9344 | 0.018472  | 1.7335    | 0.047207  | 3-1                                |
| a.Glycerophosphate  | 2.8748 | 0.020406  | 1.6902    | 0.049405  | 7-2; 7-5                           |

**Table S7:** Physico-chemical parameters (mean  $\pm$  SE) of the different  $p\text{CO}_2$  treatments for larval setup ( $n_{\text{kreisels}} = 4$  per  $p\text{CO}_2$  condition) and juvenile setup ( $n_{\text{tanks}} = 3$  per  $p\text{CO}_2$  condition). Seawater temperature, salinity, oxygen content,  $\text{pH}_T$  (pH on the total scale) and total alkalinity ( $A_T$ ) were measured whereas the other parameters of the carbonate system were calculated with CO2sys software (Lewis & Wallace, 1998).  $p\text{CO}_2$ :  $\text{CO}_2$  partial pressure; DIC: dissolved inorganic carbon;  $\text{HCO}_3^-$ : bicarbonates concentration;  $\text{CO}_3^{2-}$ : carbonates concentration;  $\Omega_{\text{Ca}}$ : saturation state of seawater with respect to calcite and  $\Omega_{\text{Ar}}$ : saturation state of seawater with respect to aragonite.

|                                                        | “Larval” setup (28 kreisels) from 1 <sup>st</sup> to 18 <sup>th</sup> of July 2016           |   |      |                                                   |   |       |                                                   |   |       |                                                  |   |       |                                                   |   |       |                                                   |   |       |                                                  |   |        |
|--------------------------------------------------------|----------------------------------------------------------------------------------------------|---|------|---------------------------------------------------|---|-------|---------------------------------------------------|---|-------|--------------------------------------------------|---|-------|---------------------------------------------------|---|-------|---------------------------------------------------|---|-------|--------------------------------------------------|---|--------|
|                                                        | 400 μatm                                                                                     |   |      | 600 μatm                                          |   |       | 800 μatm                                          |   |       | 1000 μatm                                        |   |       | 1200 μatm                                         |   |       | 2000 μatm                                         |   |       | 3000 μatm                                        |   |        |
|                                                        | n=59 except for salinity & A <sub>T</sub> (n= 6)                                             |   |      | n=4 except for salinity & A <sub>T</sub> (n= 6)   |   |       | n=68 except for salinity & A <sub>T</sub> (n= 6)  |   |       | n=68 except for salinity & A <sub>T</sub> (n= 6) |   |       | n=68 except for salinity & A <sub>T</sub> (n= 6)  |   |       | n=56 except for salinity & A <sub>T</sub> (n= 6)  |   |       | n=51 except for salinity & A <sub>T</sub> (n= 6) |   |        |
| Temperature (°C)                                       | 17.97                                                                                        | ± | 0.03 | 17.95                                             | ± | 0.04  | 17.97                                             | ± | 0.03  | 17.95                                            | ± | 0.04  | 17.88                                             | ± | 0.05  | 17.96                                             | ± | 0.04  | 17.97                                            | ± | 0.03   |
| Salinity                                               | 31.28                                                                                        | ± | 0.03 | 31.37                                             | ± | 0.10  | 31.42                                             | ± | 0.08  | 31.40                                            | ± | 0.08  | 31.42                                             | ± | 0.06  | 31.37                                             | ± | 0.06  | 31.33                                            | ± | 0.06   |
| Oxygen (% sat)                                         | 99.70                                                                                        | ± | 1.04 | 96.89                                             | ± | 1.80  | 97.44                                             | ± | 1.66  | 98.17                                            | ± | 1.09  | 99.24                                             | ± | 1.03  | 97.98                                             | ± | 1.24  | 98.20                                            | ± | 1.22   |
| pH <sub>T</sub>                                        | 7.99                                                                                         | ± | 0.00 | 7.85                                              | ± | 0.01  | 7.78                                              | ± | 0.01  | 7.72                                             | ± | 0.01  | 7.62                                              | ± | 0.01  | 7.38                                              | ± | 0.01  | 7.22                                             | ± | 0.01   |
| A <sub>T</sub> (μEq kg <sup>-1</sup> )                 | 2098.27                                                                                      | ± | 3.71 | 2097.75                                           | ± | 5.81  | 2100.07                                           | ± | 4.70  | 2092.04                                          | ± | 3.04  | 2098.65                                           | ± | 6.96  | 2107.73                                           | ± | 4.71  | 2100.10                                          | ± | 8.37   |
| DIC (μmol kg <sup>-1</sup> )                           | 1922.37                                                                                      | ± | 1.18 | 1983.51                                           | ± | 4.03  | 2007.84                                           | ± | 3.34  | 2013.48                                          | ± | 3.67  | 2054.43                                           | ± | 4.11  | 2134.02                                           | ± | 3.56  | 2167.89                                          | ± | 4.76   |
| pCO <sub>2</sub> (μatm)                                | 437.35                                                                                       | ± | 3.79 | 651.68                                            | ± | 21.51 | 778.03                                            | ± | 18.92 | 897.62                                           | ± | 33.96 | 1155.76                                           | ± | 36.47 | 2062.23                                           | ± | 63.16 | 2974.21                                          | ± | 75.12  |
| HCO <sub>3</sub> <sup>-</sup> (μmol kg <sup>-1</sup> ) | 1773.58                                                                                      | ± | 1.85 | 1858.46                                           | ± | 5.40  | 1892.84                                           | ± | 4.19  | 1903.57                                          | ± | 4.26  | 1950.58                                           | ± | 4.15  | 2023.85                                           | ± | 2.43  | 2037.57                                          | ± | 3.97   |
| CO <sub>3</sub> <sup>2-</sup> (μmol kg <sup>-1</sup> ) | 133.54                                                                                       | ± | 0.83 | 102.32                                            | ± | 2.21  | 87.87                                             | ± | 1.63  | 78.61                                            | ± | 1.70  | 63.47                                             | ± | 1.43  | 37.90                                             | ± | 0.95  | 26.59                                            | ± | 0.65   |
| Ω <sub>Ca</sub>                                        | 3.26                                                                                         | ± | 0.02 | 2.50                                              | ± | 0.05  | 2.15                                              | ± | 0.04  | 1.92                                             | ± | 0.04  | 1.55                                              | ± | 0.03  | 0.93                                              | ± | 0.02  | 0.65                                             | ± | 0.02   |
| Ω <sub>ar</sub>                                        | 2.09                                                                                         | ± | 0.01 | 1.60                                              | ± | 0.03  | 1.38                                              | ± | 0.03  | 1.23                                             | ± | 0.03  | 0.99                                              | ± | 0.02  | 0.59                                              | ± | 0.01  | 0.42                                             | ± | 0.01   |
|                                                        | “Juvenile setup” (21 tanks) from 18 <sup>th</sup> of July to 21 <sup>st</sup> of August 2016 |   |      |                                                   |   |       |                                                   |   |       |                                                  |   |       |                                                   |   |       |                                                   |   |       |                                                  |   |        |
|                                                        | 400 μatm                                                                                     |   |      | 600 μatm                                          |   |       | 800 μatm                                          |   |       | 1000 μatm                                        |   |       | 1200 μatm                                         |   |       | 2000 μatm                                         |   |       | 3000 μatm                                        |   |        |
|                                                        | n=105 except for salinity, A <sub>T</sub> and DIC(n=6)                                       |   |      | n=105 except for salinity & A <sub>T</sub> (n= 6) |   |       | n=103 except for salinity & A <sub>T</sub> (n= 6) |   |       | n=94 except for salinity & A <sub>T</sub> (n= 6) |   |       | n=135 except for salinity & A <sub>T</sub> (n= 6) |   |       | n=105 except for salinity & A <sub>T</sub> (n= 6) |   |       | n=96 except for salinity & A <sub>T</sub> (n= 6) |   |        |
| Temperature (°C)                                       | 17.92                                                                                        | ± | 0.02 | 18.06                                             | ± | 0.13  | 18.10                                             | ± | 0.10  | 18.03                                            | ± | 0.12  | 17.98                                             | ± | 0.12  | 17.96                                             | ± | 0.01  | 17.96                                            | ± | 0.02   |
| Salinity                                               | 31.47                                                                                        | ± | 0.12 | 31.50                                             | ± | 0.12  | 31.47                                             | ± | 0.12  | 31.52                                            | ± | 0.08  | 31.52                                             | ± | 0.11  | 31.55                                             | ± | 0.06  | 31.58                                            | ± | 0.08   |
| Oxygen (% sat)                                         | 98.62                                                                                        | ± | 0.79 | 99.14                                             | ± | 1.12  | 99.41                                             | ± | 1.11  | 110.49                                           | ± | 11.06 | 99.15                                             | ± | 0.70  | 108.81                                            | ± | 9.39  | 98.45                                            | ± | 0.83   |
| pH <sub>T</sub>                                        | 7.97                                                                                         | ± | 0.00 | 7.88                                              | ± | 0.01  | 7.79                                              | ± | 0.01  | 7.70                                             | ± | 0.01  | 7.66                                              | ± | 0.01  | 7.36                                              | ± | 0.01  | 7.14                                             | ± | 0.01   |
| A <sub>T</sub> (μmol kg <sup>-1</sup> )                | 2131.20                                                                                      | ± | 5.33 | 2132.32                                           | ± | 3.67  | 2133.43                                           | ± | 4.52  | 2135.74                                          | ± | 6.16  | 2133.24                                           | ± | 4.43  | 2132.37                                           | ± | 4.98  | 2136.44                                          | ± | 5.15   |
| DIC (μmol kg <sup>-1</sup> )                           | 1959.24                                                                                      | ± | 0.97 | 1992.08                                           | ± | 2.17  | 2024.90                                           | ± | 2.92  | 2054.68                                          | ± | 3.30  | 2067.09                                           | ± | 2.35  | 2154.74                                           | ± | 3.39  | 2231.76                                          | ± | 3.92   |
| pCO <sub>2</sub> (μatm)                                | 473.87                                                                                       | ± | 2.61 | 601.79                                            | ± | 14.32 | 773.79                                            | ± | 25.52 | 968.56                                           | ± | 32.87 | 1061.44                                           | ± | 22.52 | 2201.55                                           | ± | 68.32 | 3714.80                                          | ± | 102.65 |
| HCO <sub>3</sub> <sup>-</sup> (μmol kg <sup>-1</sup> ) | 1814.35                                                                                      | ± | 1.16 | 1861.42                                           | ± | 2.98  | 1905.74                                           | ± | 3.75  | 1943.43                                          | ± | 4.12  | 1959.96                                           | ± | 2.94  | 2040.49                                           | ± | 2.02  | 2079.37                                          | ± | 1.28   |
| CO <sub>3</sub> <sup>2-</sup> (μmol kg <sup>-1</sup> ) | 128.34                                                                                       | ± | 0.59 | 109.84                                            | ± | 1.29  | 92.32                                             | ± | 1.67  | 77.91                                            | ± | 1.89  | 70.06                                             | ± | 1.32  | 37.43                                             | ± | 0.90  | 22.61                                            | ± | 0.50   |
| Ω <sub>Ca</sub>                                        | 3.13                                                                                         | ± | 0.01 | 2.68                                              | ± | 0.03  | 2.26                                              | ± | 0.04  | 1.90                                             | ± | 0.05  | 1.71                                              | ± | 0.03  | 0.92                                              | ± | 0.02  | 0.55                                             | ± | 0.01   |
| Ω <sub>ar</sub>                                        | 2.01                                                                                         | ± | 0.01 | 1.72                                              | ± | 0.02  | 1.45                                              | ± | 0.03  | 1.22                                             | ± | 0.03  | 1.09                                              | ± | 0.02  | 0.59                                              | ± | 0.01  | 0.35                                             | ± | 0.01   |

**Figure S1. Metabolomic fingerprinting stages III to IV.** Metabolome differences between  $p\text{CO}_2$  groups in lobster larval stages III, IV and V **(a)** PCA 2D score plot with 95% confidence intervals for stage III, **(b)** PCA 2D score plot with 95% confidence intervals for stage IV, **(c)** PCA 2D score plot with 95 % confidence intervals for stage V, **(d)** PLS-DA scores plot with 95% confidence intervals for stage V. Model validation was calculated by the prediction accuracy during training test statistic with 1000 permutations,  $p = 0.016$ , **(e)** PLS-DA Variable Importance in Projection scores (VIP > 1 for significance). None of the metabolites were significant in the univariate ANOVA (FDR 0.05).  $p\text{CO}_2$  groups: 1 – 400  $\mu\text{atm}$ , 2- 600  $\mu\text{atm}$ , 3 – 800  $\mu\text{atm}$ , 4 – 1000  $\mu\text{atm}$ , 5 – 1200  $\mu\text{atm}$ , 6 – 2000  $\mu\text{atm}$ , 7 – 3000  $\mu\text{atm}$ ). Group 6 and 7 are lacking from stage V analysis due to mortality levels.

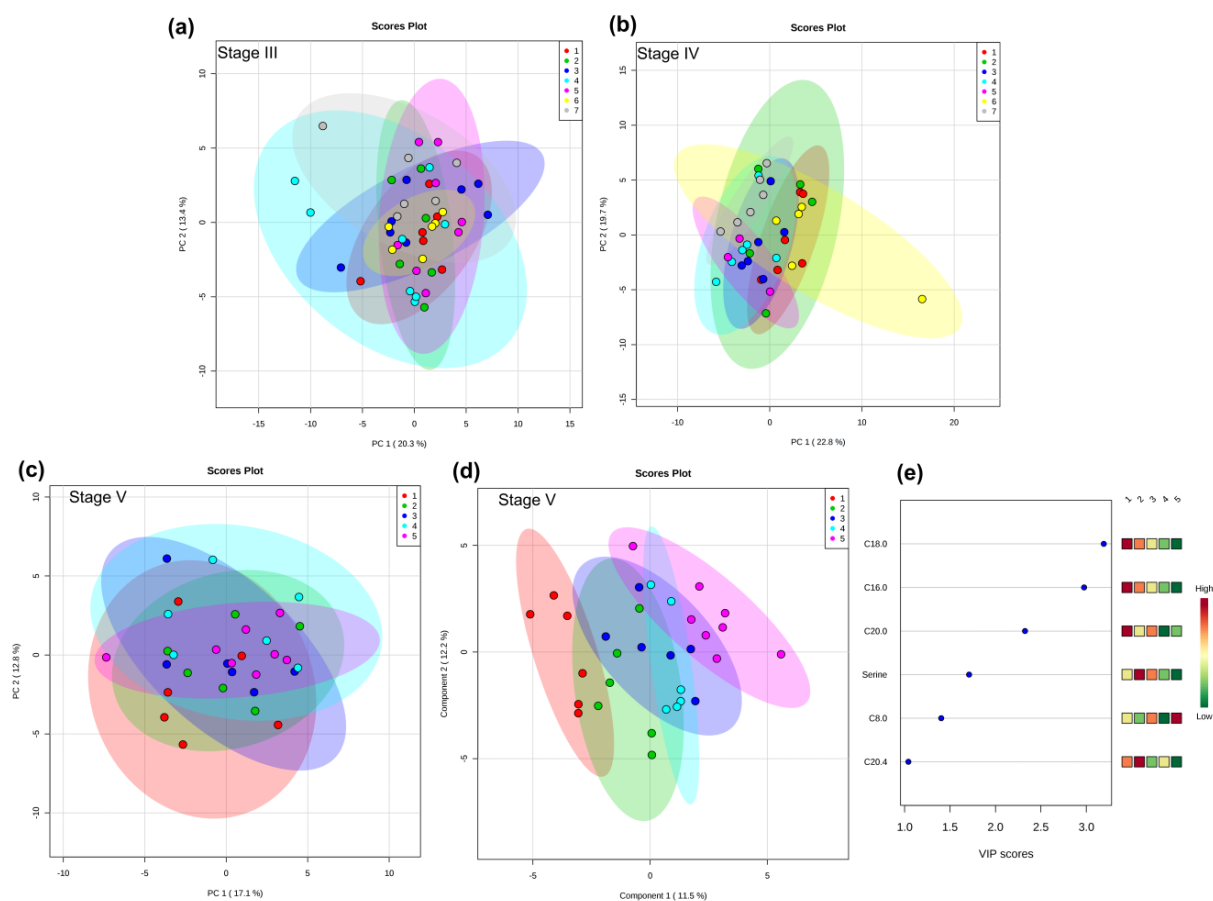

Supplement: s1 [file s1]
